# Supplementary material for: NADC30-Like Porcine Reproductive and Respiratory Syndrome in China
Source: PubMed Central journal article supplement (PMC5543618; doi:10.2174/1874357901711010059), 2017-06-30
Supplement: TOVJ-11-59_SD1.pdf [file TOVJ-11-59_SD1.pdf]

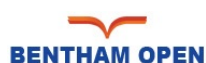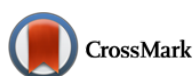

# The Open Virology Journal

## Supplementary Material

Content list available at: [www.benthamopen.com/TOVJ/](http://www.benthamopen.com/TOVJ/)

DOI: 10.2174/1874357901711010059

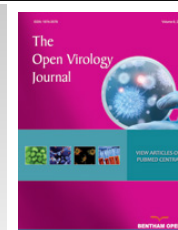

## NADC30-Like Porcine Reproductive and Respiratory Syndrome in China

Kegong Tian<sup>1,2,\*</sup><sup>1</sup>College of Animal Science and Veterinary Medicine, Henan Agricultural University, Zhengzhou, China<sup>2</sup>OIE Porcine Reproductive and Respiratory Syndrome Laboratory, Beijing, China

Received: October 06, 2016

Revised: November 01, 2016

Accepted: February 06, 2017

### SUPPLEMENTAL DATA

Suppl 1. Information of PRRSV strains used in phylogenetic analysis. Vaccine strains were indicated by the names in bold.

| Virus strain     | Isolation Year | Country | Access No. |
|------------------|----------------|---------|------------|
| 10CN10GDHD       | 2010           | China   | JX215553   |
| 10CN10HB3        | 2010           | China   | JQ663553   |
| 09CN09HEN1       | 2009           | China   | JF268684   |
| 11CNGD2011       | 2011           | China   | KC527830   |
| 10CN10BJ3        | 2010           | China   | JQ663542   |
| 10CN10FJ3        | 2010           | China   | JQ663548   |
| 09CN09HUB1       | 2009           | China   | JF268682   |
| 09CNSX2009       | 2009           | China   | FJ895329   |
| 07CNCG           | 2007           | China   | EU864231   |
| 07CNGDQY2        | 2007           | China   | GU454850   |
| 08CNGDBY1        | 2008           | China   | GQ374442   |
| 06CNBJsy06       | 2006           | China   | EU097707   |
| 11CN11GDF1       | 2011           | China   | JX215551   |
| <b>JXA1-R</b>    | 2009           | China   | FJ548853   |
| 14CNHB1401       | 2014           | China   | KM261784   |
| 11CNWUH4         | 2011           | China   | JQ326271   |
| 06CNJXA1         | 2006           | China   | EF112445   |
| 08CNHPBEDV       | 2008           | China   | EU236259   |
| 07CNHUN4         | 2007           | China   | EF635006   |
| <b>Hun4-F112</b> | 2010           | China   | /          |
| 12CNHZ_31        | 2012           | China   | KC445138   |
| 14CNHNA12        | 2014           | China   | KJ819934   |
| 08CNNT0801       | 2008           | China   | HQ315836   |
| 04CNNB_04        | 2004           | China   | FJ536165   |
| 05CNSHB          | 2005           | China   | EU864232   |
| 02CNHB1_02       | 2002           | China   | AY150312   |
| 07CNEm2007       | 2007           | China   | EU262603   |
| <b>CH1R</b>      | 2008           | China   | EU807840   |
| 96CNCH_1a        | 1996           | China   | AY032626   |

Uwrr13 contd.....

| Virus strain     | Isolation Year | Country    | Access No. |
|------------------|----------------|------------|------------|
| 96USJA142        | 1996           | USA        | AY424271   |
| <b>ATP</b>       | 2006           | USA        | DQ988080   |
| <b>14USATP2</b>  | 2014           | USA        | EF532801   |
| 10CNQY2010       | 2010           | China      | JQ743666   |
| 92USAT2332       | 1992           | USA        | U87392     |
| <b>09CNSD1_H</b> | 2009           | China      | GQ914997   |
| 97CNS1           | 1997           | China      | DQ459471   |
| 96CNBJ_4         | 1996           | China      | AF331831   |
| <b>00USMLV2</b>  | 2000           | USA        | AF159149   |
| <b>MLV</b>       | 1998           | USA        | AF066183   |
| 11JPNagasa       | 2011           | Japan      | AB811786   |
| 92JPEDRD1        | 1992           | Japan      | AB288356   |
| 03HKHK2          | 2003           | HongKong   | KF287133   |
| 04HKHK11         | 2004           | HongKong   | KF287138   |
| 10KRA4699        | 2010           | Korea      | JX138236   |
| 01USMN184C       | 2001           | USA        | EF488739   |
| 15HNyc           | 2015           | China      | KT945018   |
| 13CNHNXINX       | 2013           | China      | KF611905   |
| 12CNHNHEB        | 2012           | China      | KJ143621   |
| 08USNADC30       | 2008           | USA        | JN654459   |
| 15HNjz           | 2015           | China      | KT945017   |
| 11CNN_NM1        | 2011           | China      | JX187609   |
| <b>Amevac</b>    | 2009           | Spain      | GU067771   |
| 91Lelystad       | 1991           | Netherland | A26843     |
| <b>MLV-DV</b>    | 1999           | Netherland | KJ127878   |

© 2017 Kegong Tian.

This is an open access article distributed under the terms of the Creative Commons Attribution 4.0 International Public License (CC-BY 4.0), a copy of which is available at: <https://creativecommons.org/licenses/by/4.0/legalcode>. This license permits unrestricted use, distribution, and reproduction in any medium, provided the original author and source are credited.
